# Supplementary material for: Contrasted Patterns of Molecular Evolution in Dominant and Recessive Self-Incompatibility Haplotypes in Arabidopsis
Source: PubMed Central journal article supplement (PMC3310759; doi:10.1371/journal.pgen.1002495), 2012-03-22

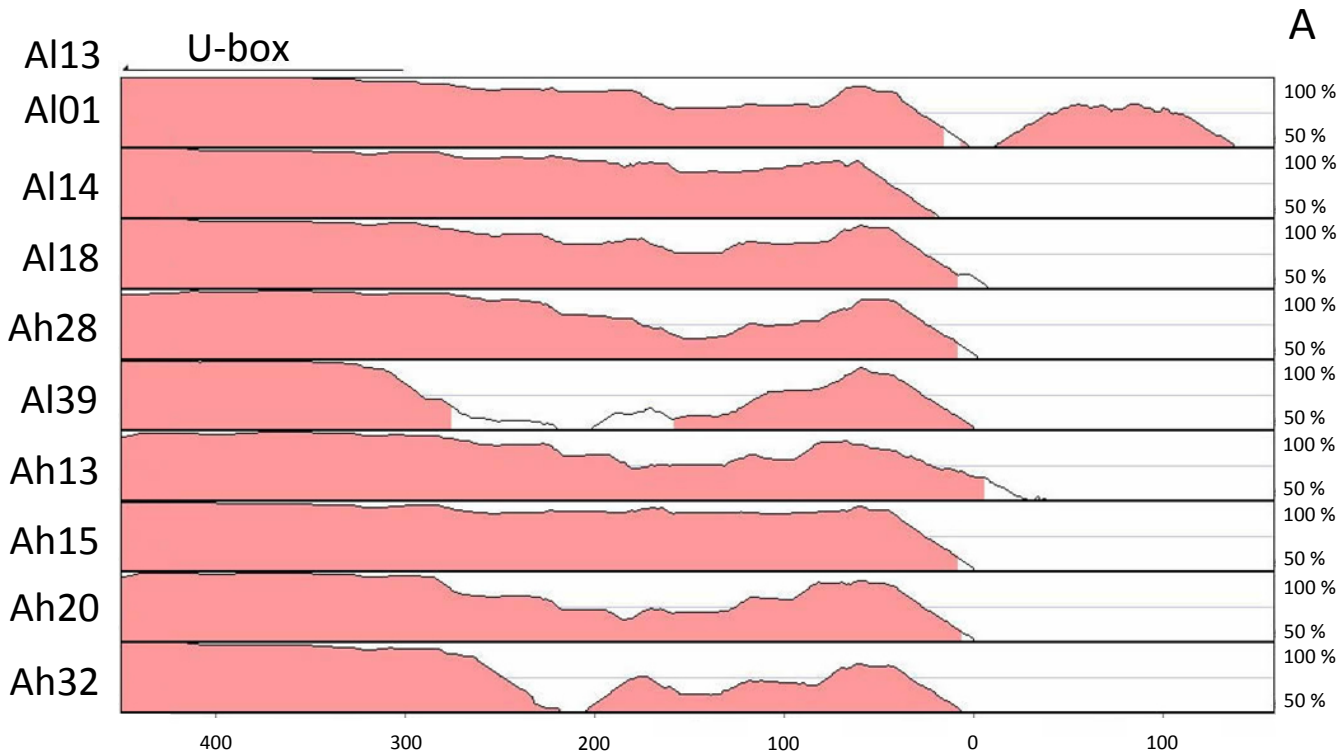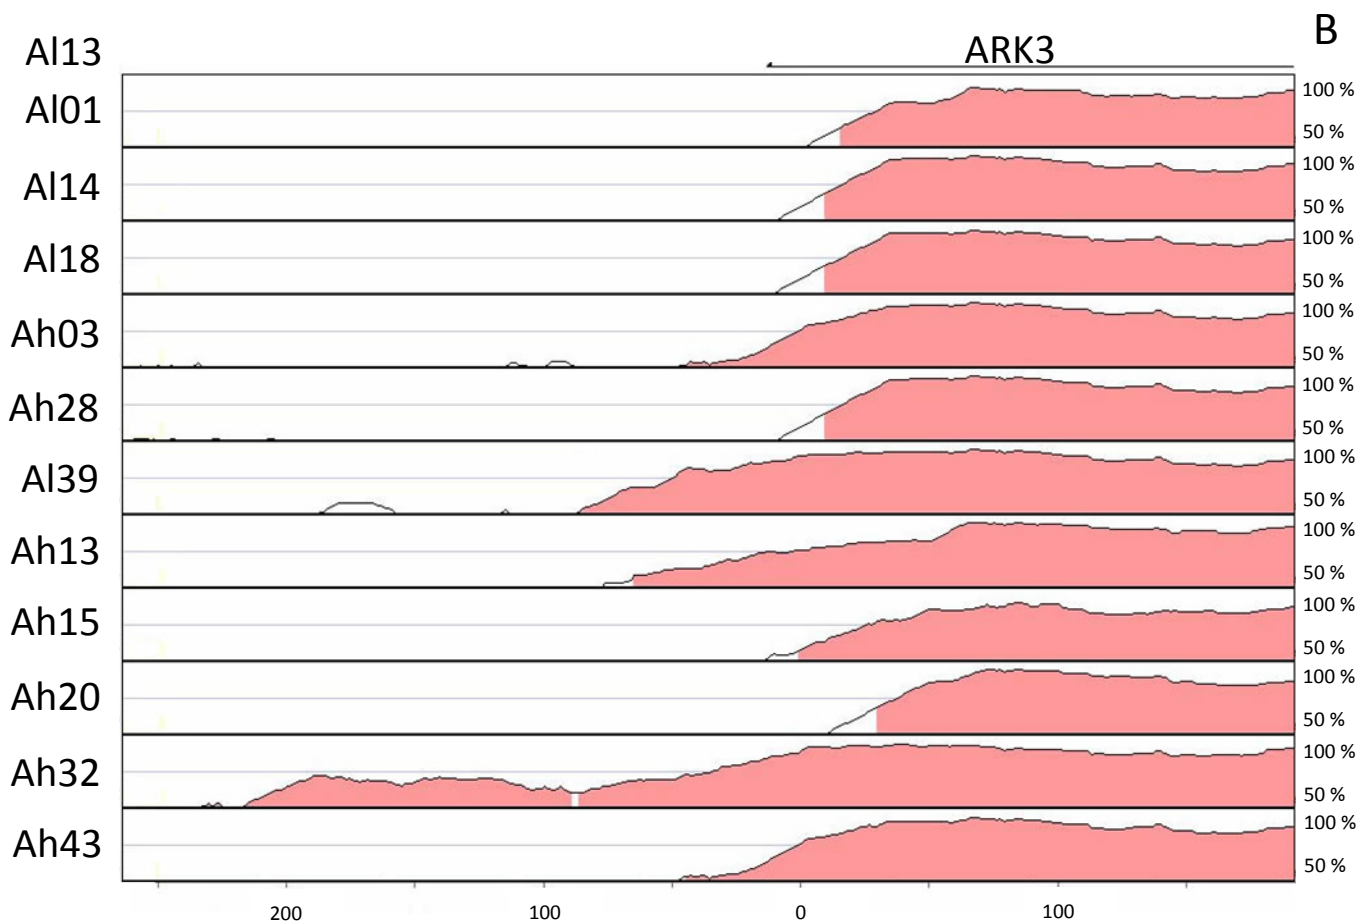

Supplement: pgen.1002495.s001.pdf [file pgen.1002495.s001.pdf]
