# Supplementary material for: Contrasted Patterns of Molecular Evolution in Dominant and Recessive Self-Incompatibility Haplotypes in Arabidopsis
Source: PubMed Central journal article supplement (PMC3310759; doi:10.1371/journal.pgen.1002495), 2012-03-22

**At4g21323**

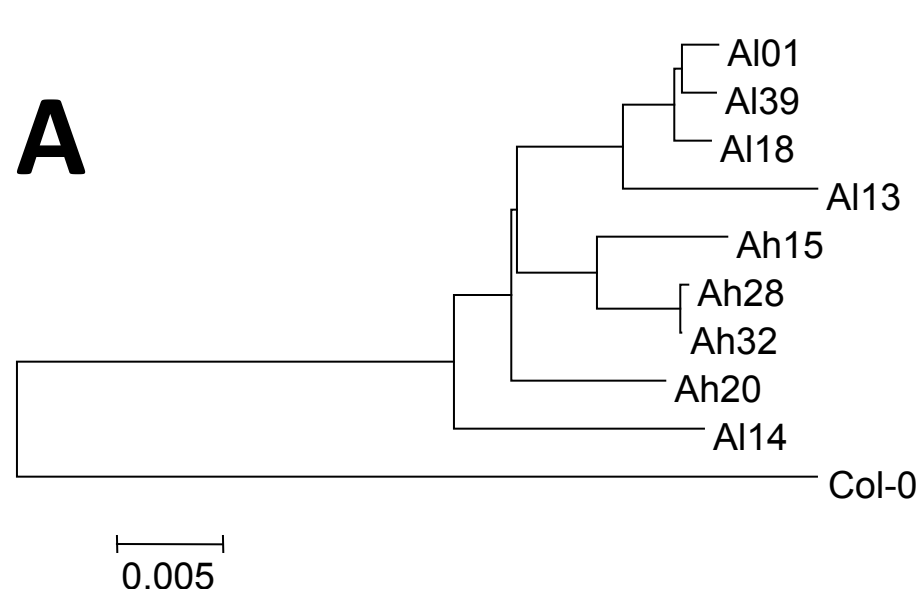

**At4g21326**

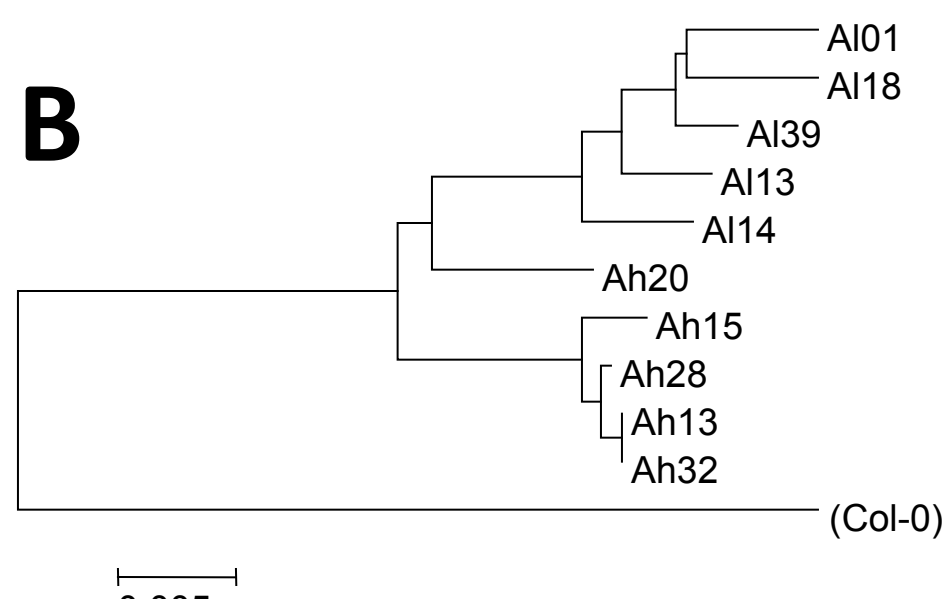

**At4g21330**

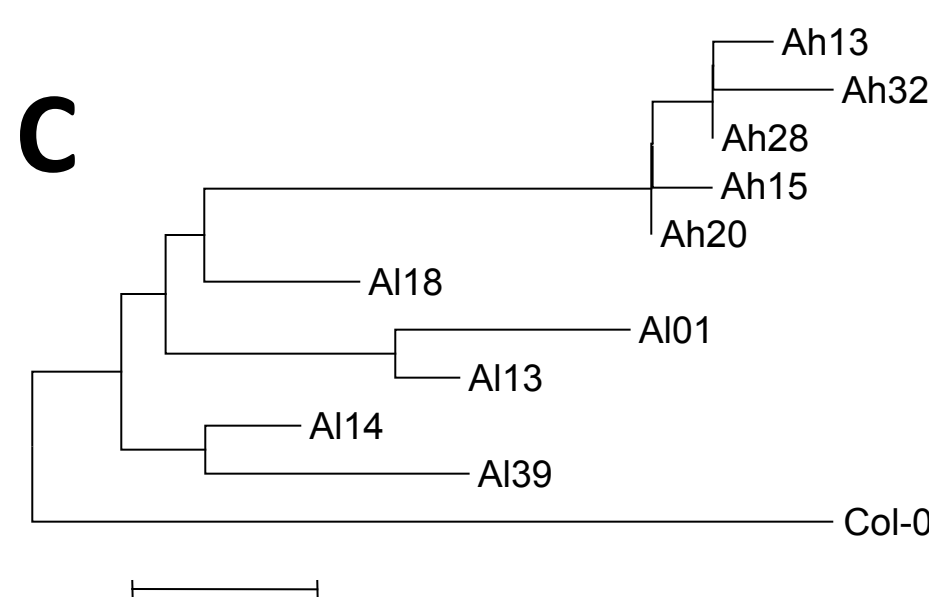

**At4g21340**

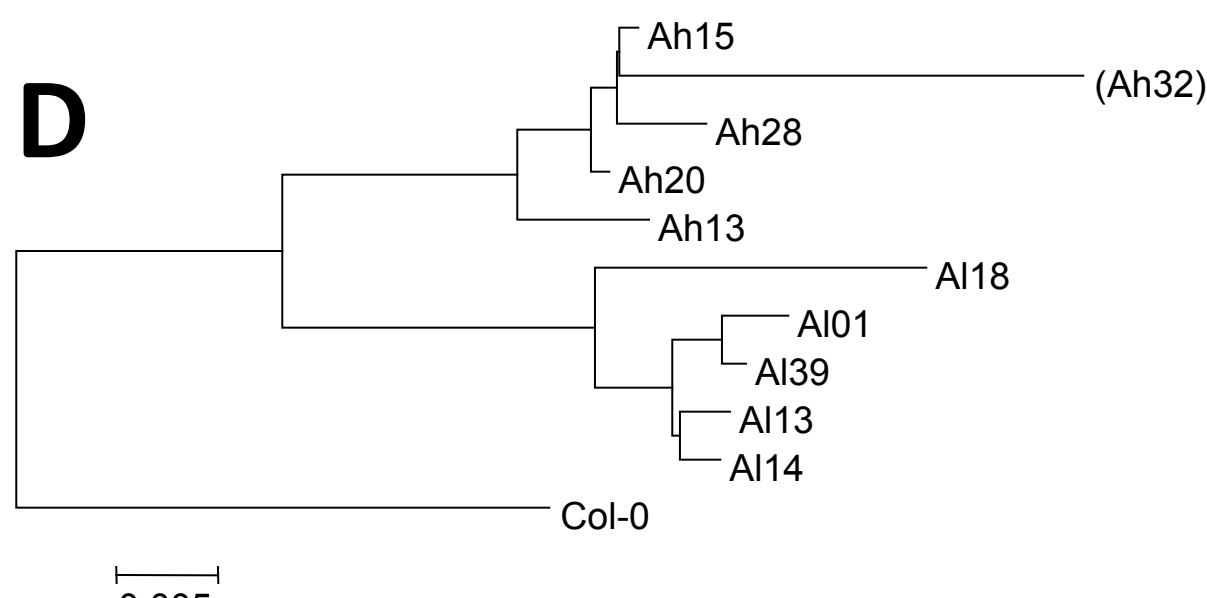

**U-box**

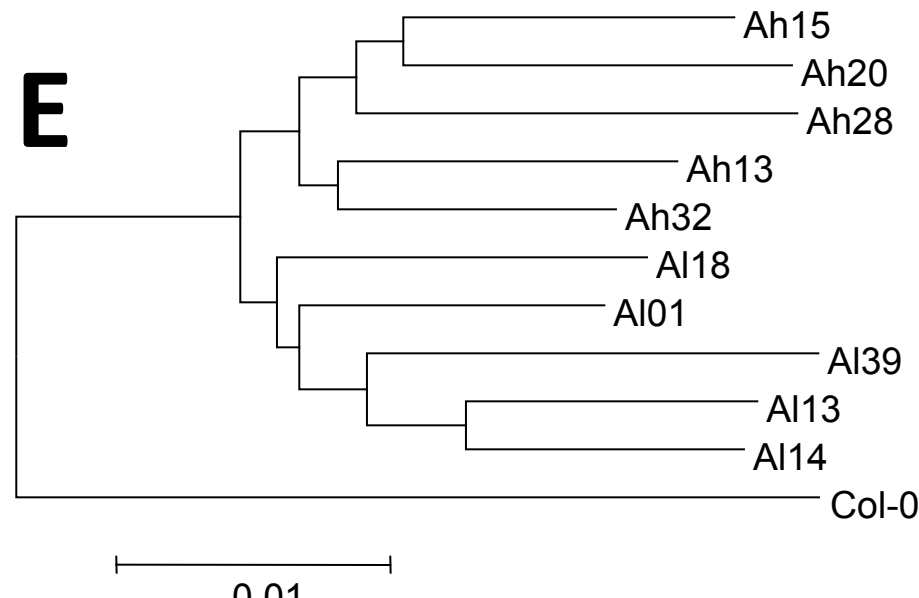

**SRK**

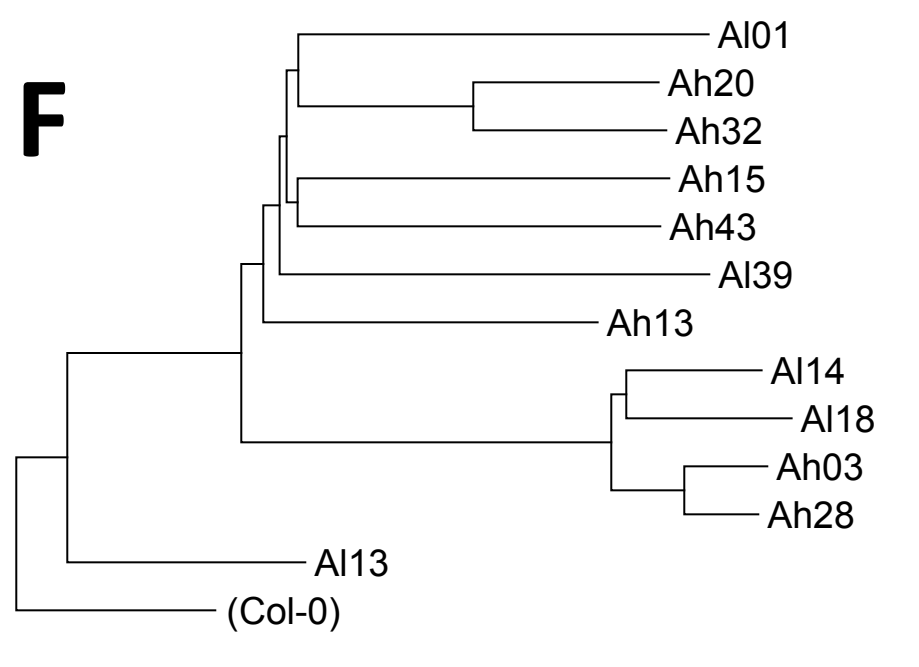

**SCR**

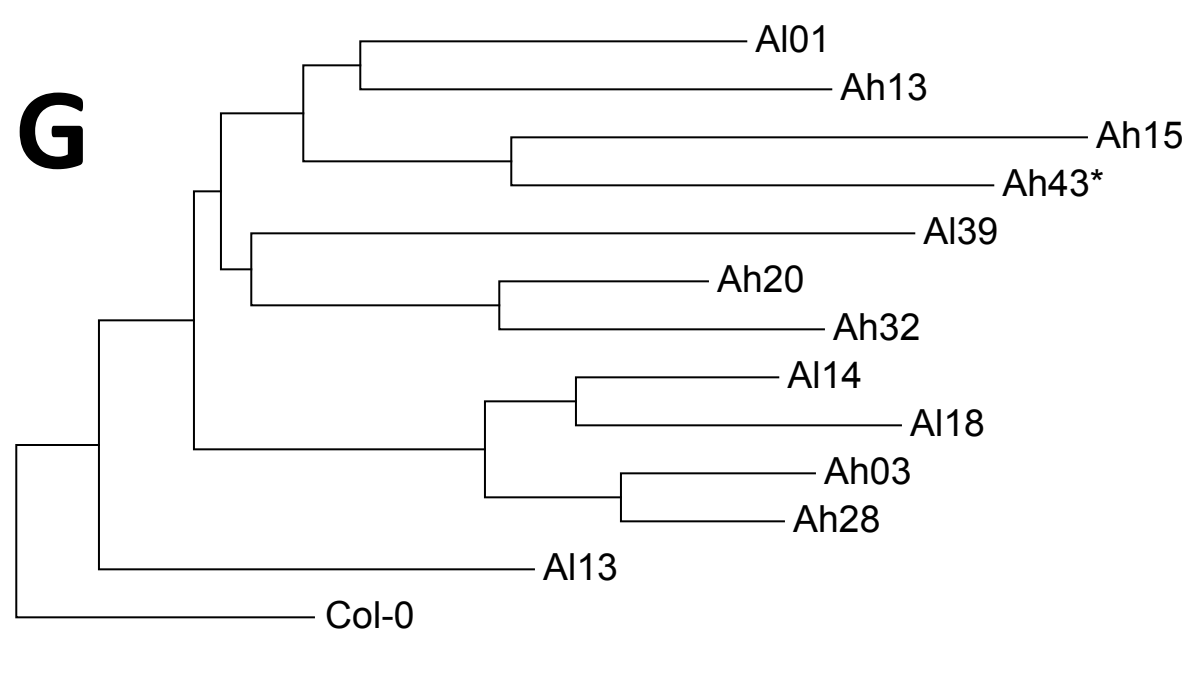

**ARK3**

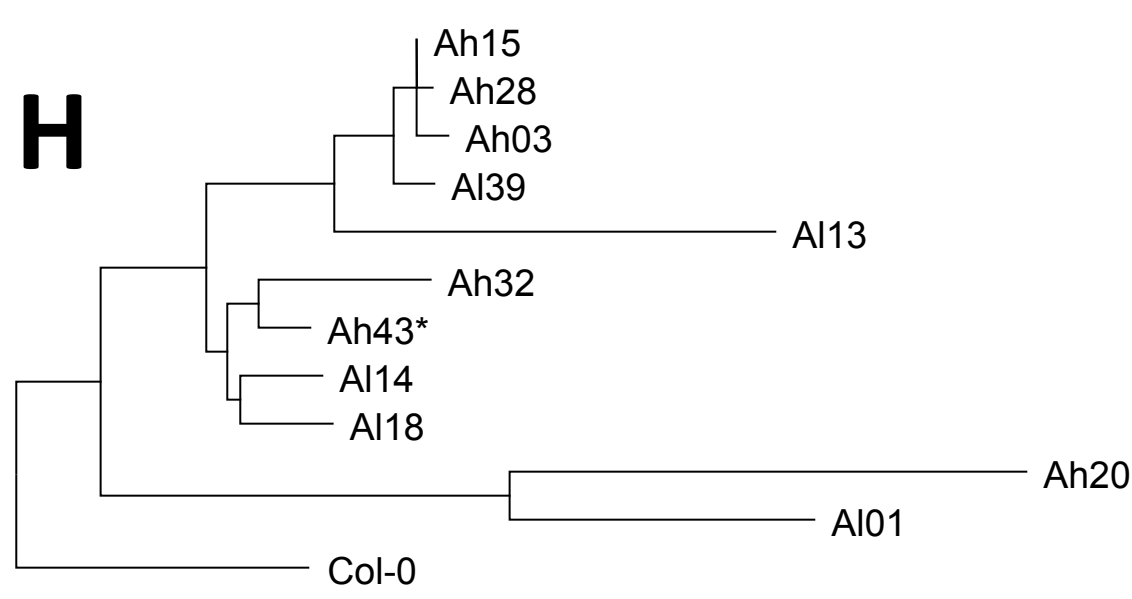

**At4g21390**

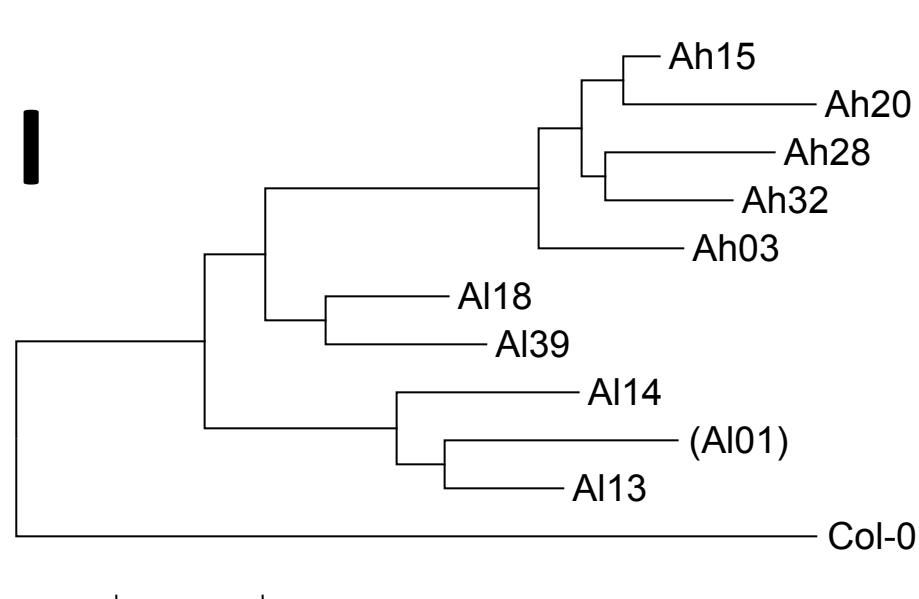

**At4g21400**

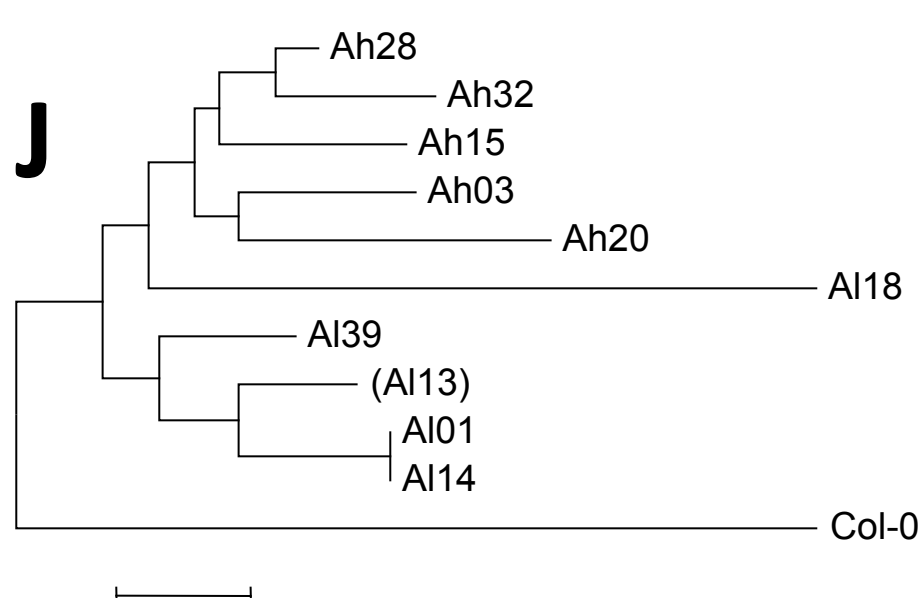

**At4g21410**

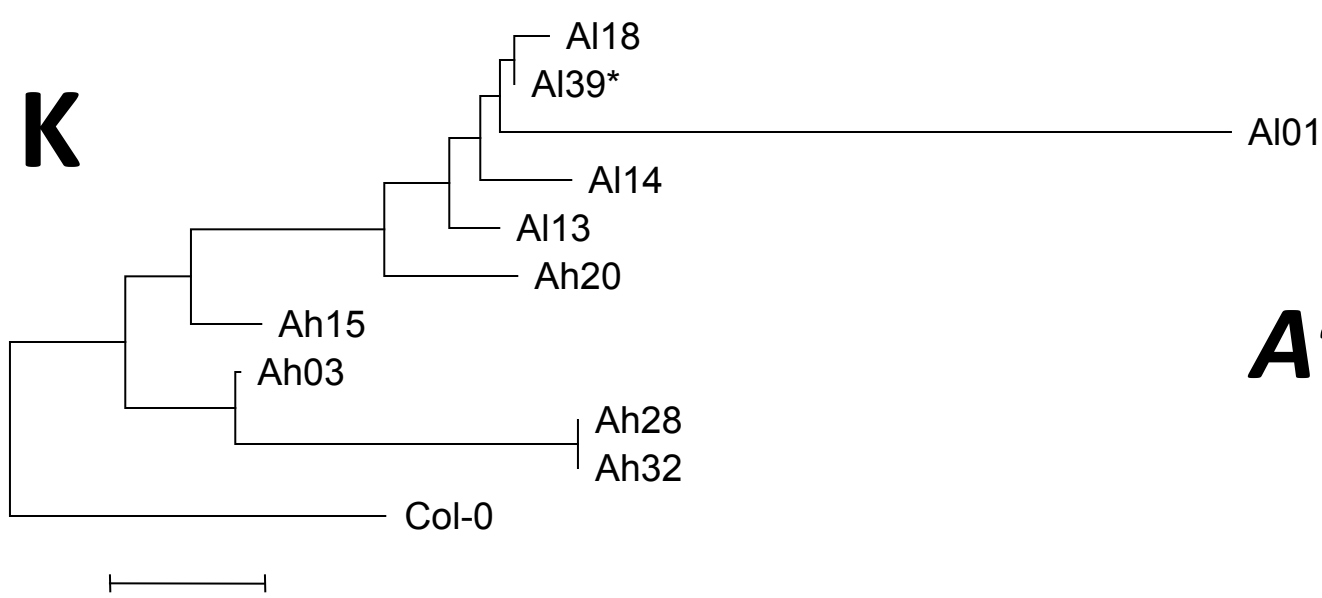

Supplement: pgen.1002495.s004.pdf [file pgen.1002495.s004.pdf]
