# Supplementary material for: Contrasted Patterns of Molecular Evolution in Dominant and Recessive Self-Incompatibility Haplotypes in Arabidopsis
Source: PubMed Central journal article supplement (PMC3310759; doi:10.1371/journal.pgen.1002495), 2012-03-22

Ah28

SRK

ARK3

Al01

Al14

Al18

Ah03

Al13

Al39

Ah13

Ah15

Ah20

Ah32

Ah43

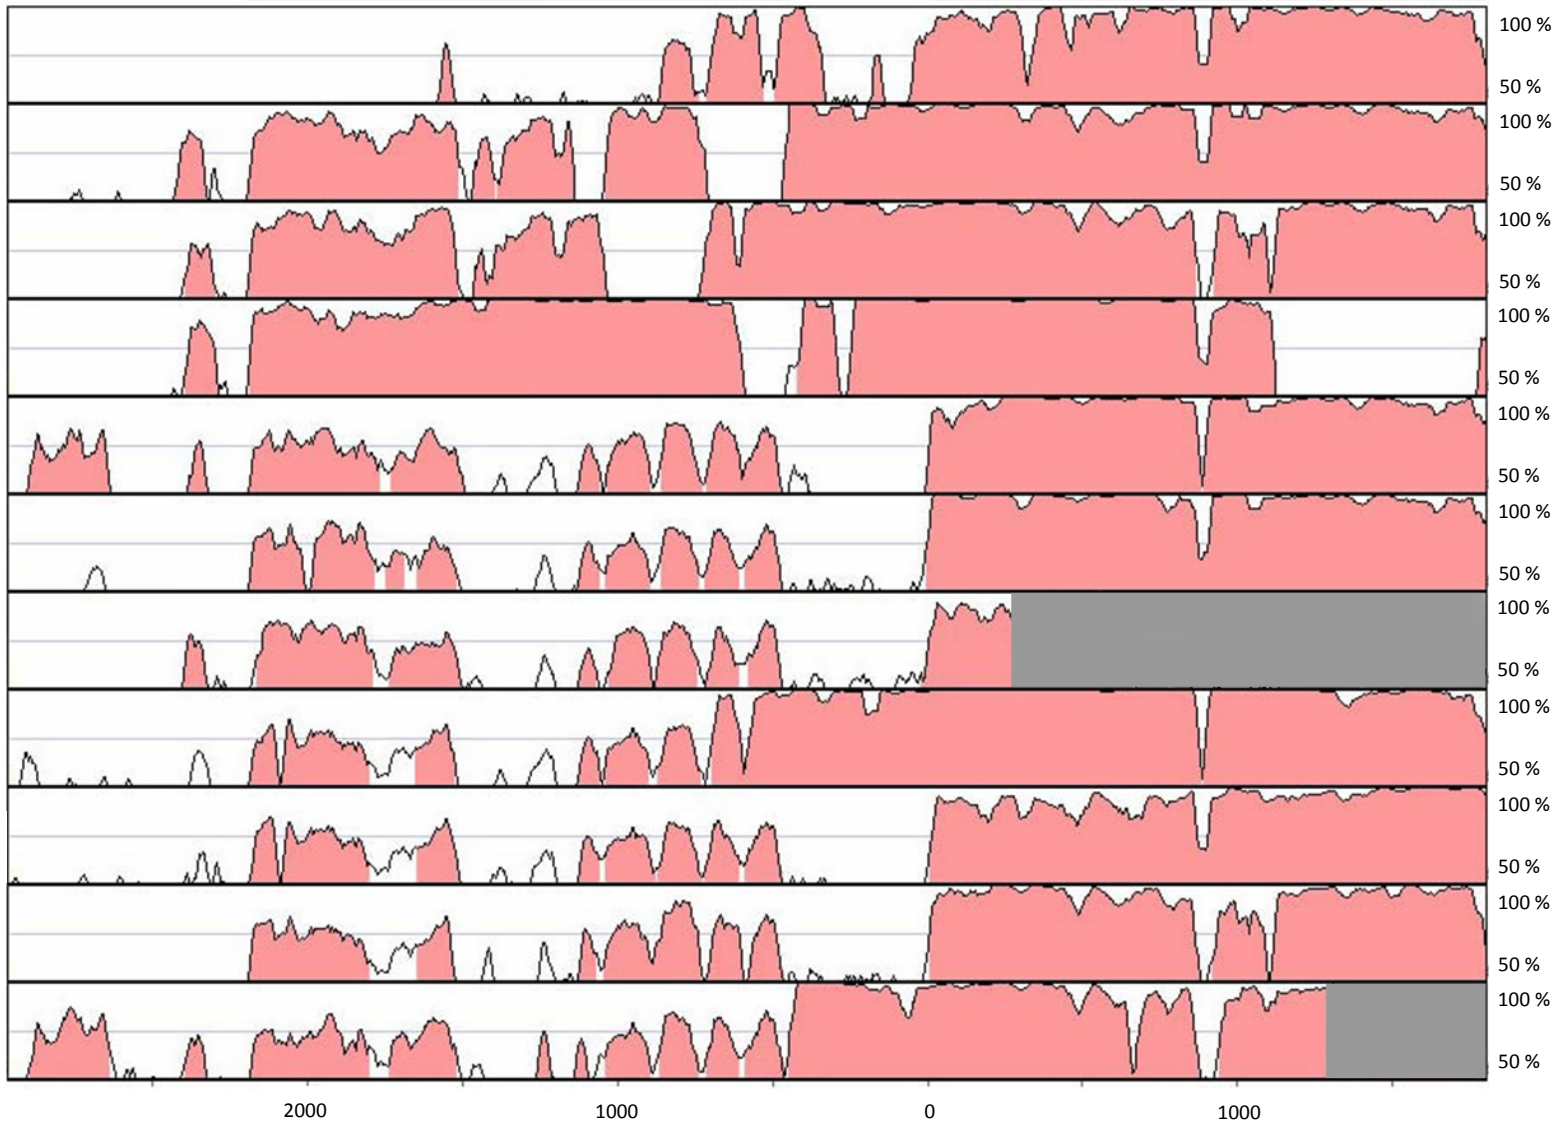

Supplement: pgen.1002495.s005.pdf [file pgen.1002495.s005.pdf]
